# Supplementary material for: Porous carbon/Fe 3 O 4 nanocomposite as a new magnetically recoverable catalyst for the preparation of polyhydroquinolines
Source: Royal Society of Chemistry journal article supplement (doi:10.1039/d4ra05432f), 2024-01-01
Supplement: d4ra05432f1.pdf [file d4ra05432f1.pdf]

## Supporting Information

### **Porous carbon/Fe<sub>3</sub>O<sub>4</sub> nanocomposite as a new magnetically catalyst for the preparation of polyhydroquinolines**

Hamid Goudarziafshar,<sup>a\*</sup> Maryam Zafari,<sup>a</sup> Ahmad Reza Moosavi-Zare,<sup>a,b\*</sup>

*<sup>a</sup>Department of Chemical Engineering, Hamedan University of Technology, Hamedan, 65155, Iran.*

*<sup>b</sup>Chemistry Department, College of Sciences, Shiraz University, Shiraz 71946-84795, Iran*

\*Corresponding author. E-mail addresses: moosavizare@yahoo.com and hamid\_gafshar@yahoo.com.

## Spectral data of compounds:

### *Ethyl 2,7,7-trimethyl-5-oxo-4-(p-tolyl)-1,4,5,6,7,8-hexahydroquinoline-3-carboxylate (2)*

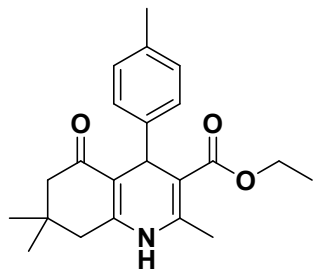

White Solid; M.p; 259-261 °C; IR (KBr,  $\text{cm}^{-1}$ ): 3276, 3208, 3083, 2935, 1701, 1647, 1605, 1495, 1380, 1215, 1194, 1072  $\text{cm}^{-1}$ ;  $^1\text{H}$  NMR (250 MHz,  $\text{DMSO}-d_6$ ):  $\delta$  (ppm) 0.83(s, 3H), 0.98 (s, 3H), 1.11 (t,  $J = 6.75$  Hz, 3H), 1.94 (d,  $J = 16.00$  Hz, 2H), 2.17 (s, 3H), 2.22 (s, 3H), 2.36-2.48 (m, 2H), 3.90-3.96 (m, 2H), 4.79 (s, 1H), 6.93-7.02 (m, 4H), 9.01 (s, 1H);  $^{13}\text{C}$  NMR(62.5 MHz,  $\text{DMSO}-d_6$ ):  $\delta$  (ppm) 14.5, 18.6, 20.9, 26.8, 29.5, 32.5, 35.7, 50.6, 59.3, 104.1, 110.4, 127.7, 128.6, 134.9, 145.1, 149.7, 167.2, 194.6.

### *Ethyl 4-(3-hydroxyphenyl)-2,7,7-trimethyl-5-oxo-1,4,5,6,7,8-hexahydroquinoline-3-carboxylate (5)*

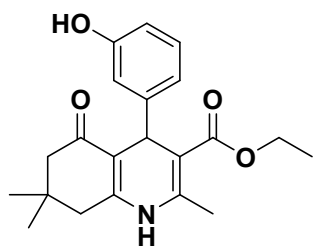

White Solid; M.p; 229-231 °C; IR (KBr,  $\text{cm}^{-1}$ ): 3279,3085, 2963,1688, 1618, 1488,1215, 1172, 869, 779;  $^1\text{H}$  NMR (250 MHz,  $\text{DMSO}-d_6$ ):  $\delta$  (ppm) 0.85 (s, 3H), 0.99 (s, 3H), 1.12 (t,  $J = 6.75$  Hz, 3H), 2.05 (dd,  $J = 29, 16$  Hz, 2H), 2.25 (s, 3H), 2.35-2.48 (m, 2H), 3.40 (d,  $J = 7.00$  Hz, 2H), 4.77 (s, 1H), 6.44 (d,  $J = 7.50$  Hz, 1H), 6.57 (s, 2H), 6.62 (t,  $J = 7.25$  Hz, 1H), 9.01 (s, 1H), 9.07

(s, 1H);  $^{13}\text{C}$ NMR (62.5 MHz,  $\text{DMSO-}d_6$ ):  $\delta$ (ppm) 14.5, 18.6, 26.9, 29.5, 32.4, 35.9, 50.6, 59.4, 104.04, 110.3, 113.01, 114.9, 118.5, 128.8, 145.08, 149.3, 149.8, 157.2, 167.3, 194.6.

*Ethyl* 4-(2,4-dichlorophenyl)-2,7,7-trimethyl-5-oxo-1,4,5,6,7,8-hexahydroquinoline-3-carboxylate (7)

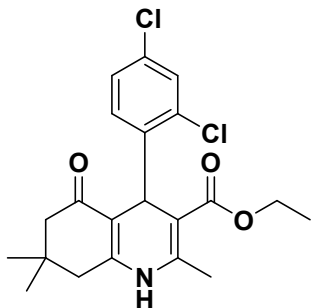

White Solid; M.p; 242-244 °C; IR (KBr,  $\text{cm}^{-1}$ ): 3283, 3078, 2957, 1706, 1647, 1609, 1107, 1073  $\text{cm}^{-1}$ ;  $^1\text{H}$  NMR (250 MHz,  $\text{DMSO-}d_6$ ):  $\delta$  (ppm) 0.81 (s, 3H), 0.97 (s, 3H), 1.05 (t,  $J=6.50$  Hz, 3H), 2.00 (dd,  $J=42, 16$  Hz, 2H), 2.23 (s, 3H), 2.36-2.48 (m, 2H), 3.91 (d,  $J=6.50$  Hz, 2H), 5.12 (s, 1H), 7.25 (s, 2H), 7.32 (s, 1H), 9.13 (s, 1H);  $^{13}\text{C}$  NMR(62.5 MHz,  $\text{DMSO-}d_6$ ):  $\delta$  (ppm) 14.4, 18.6, 26.7, 29.4, 32.3, 35.1, 50.5, 59.4, 103.1, 109.6, 127.2, 128.5, 131.1, 133.2, 144.6, 145.8, 150.2, 166.9, 194.3.

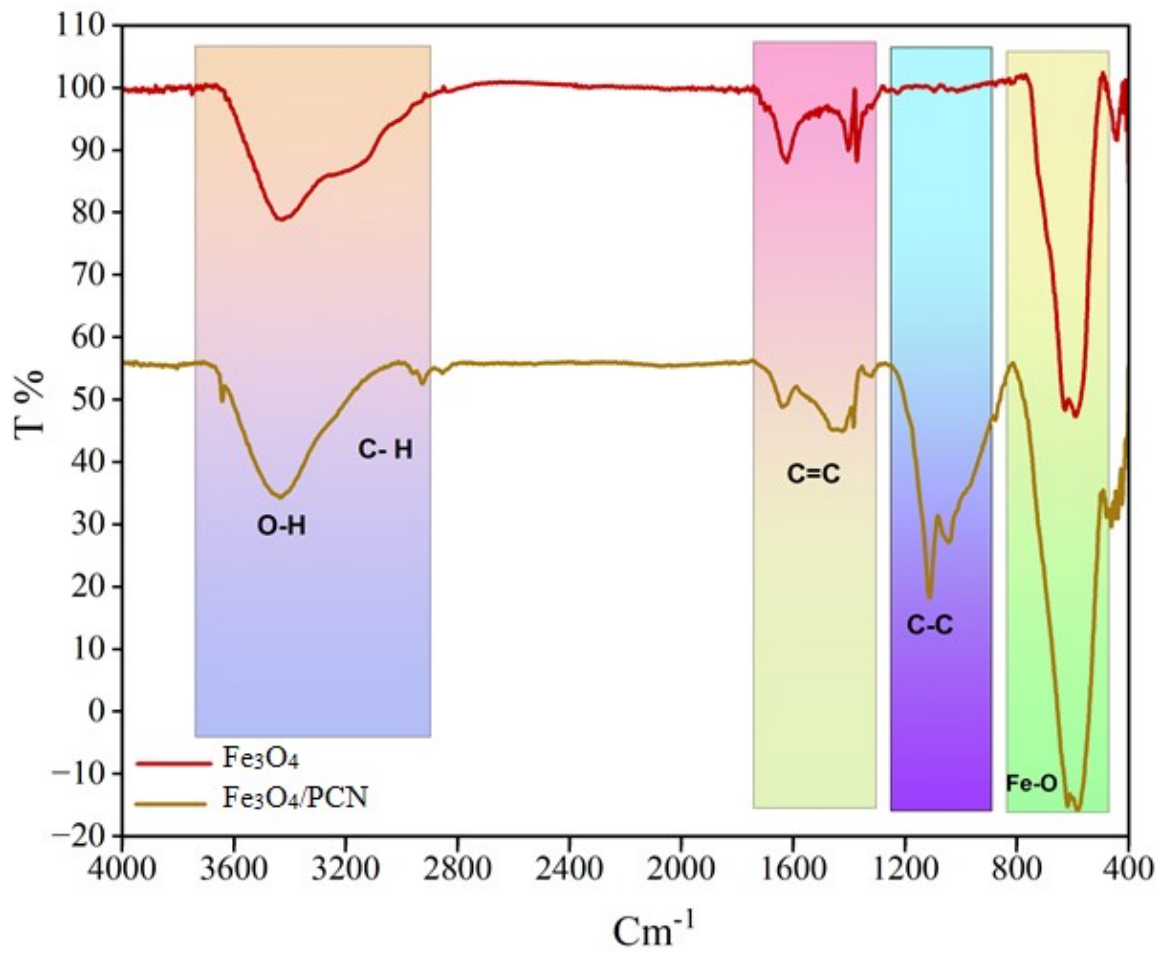

**Figure S1.** FT-IR spectrum of Fe<sub>3</sub>O<sub>4</sub>/PCN in comparison with Fe<sub>3</sub>O<sub>4</sub>

ethyl 2,7,7-trimethyl-5-oxo-4-(p-tolyl)-1,4,5,6,7,8-hexahydroquinoline-3-carboxylate

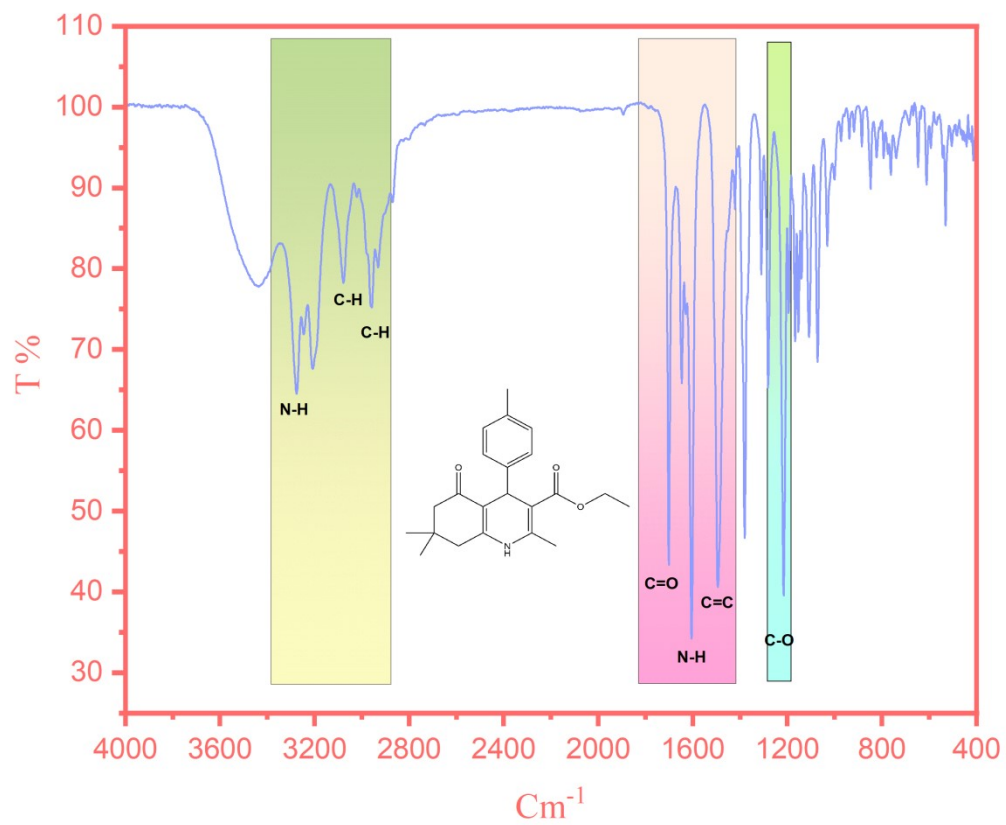

Figure S2. FT-IR spectrum of compound 2.

Zafari-4-methyl-1402-10-10

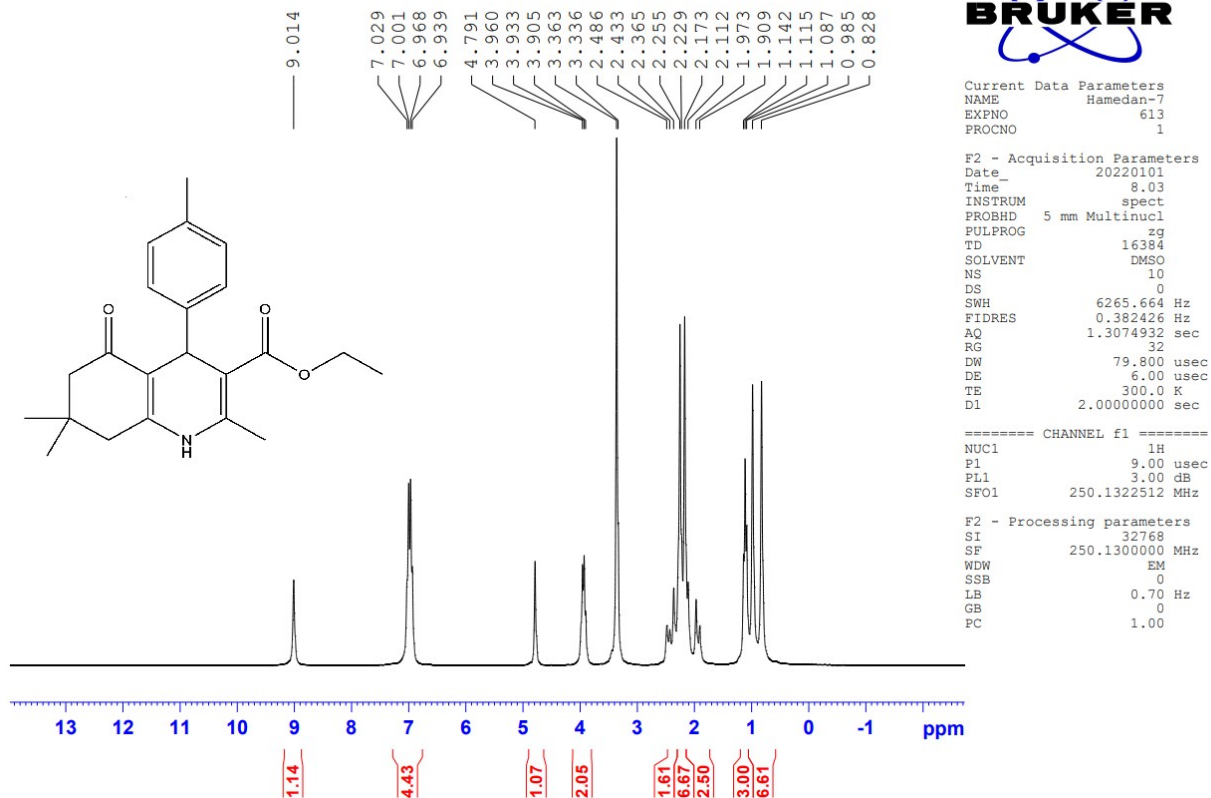

Figure S3. <sup>1</sup>H NMR spectrum of compound 2.

Zafari-4methyl-benzaldehyde

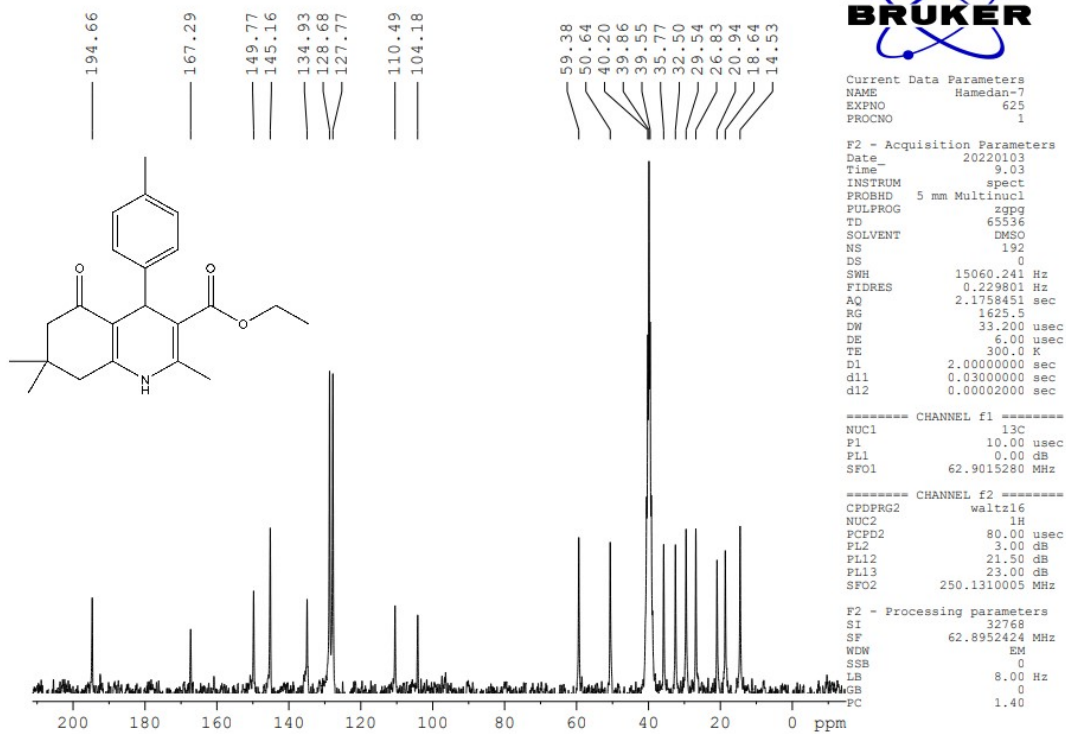

Figure S4. <sup>13</sup>C NMR spectrum of compound 2.

ethyl 4-(3-hydroxyphenyl)-2,7,7-trimethyl-5-oxo-1,4,5,6,7,8-hexahydroquinoline-3-carboxylate

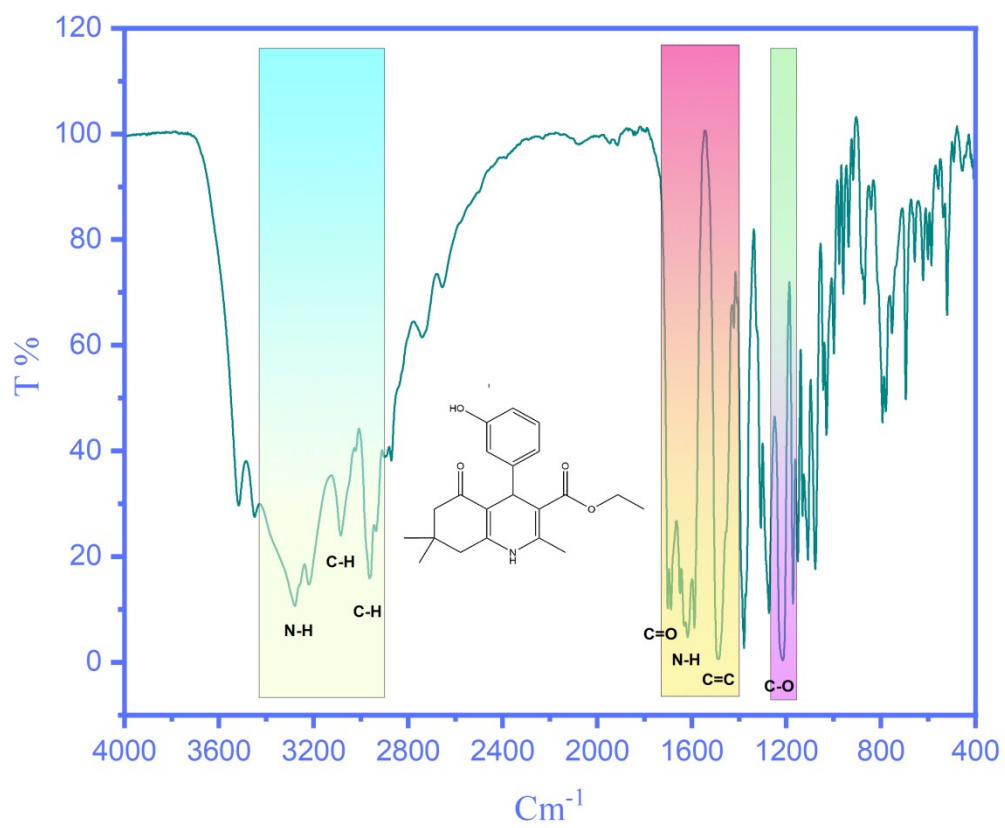

**Figure S5.** FT-IR spectrum of compound 5.



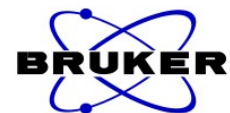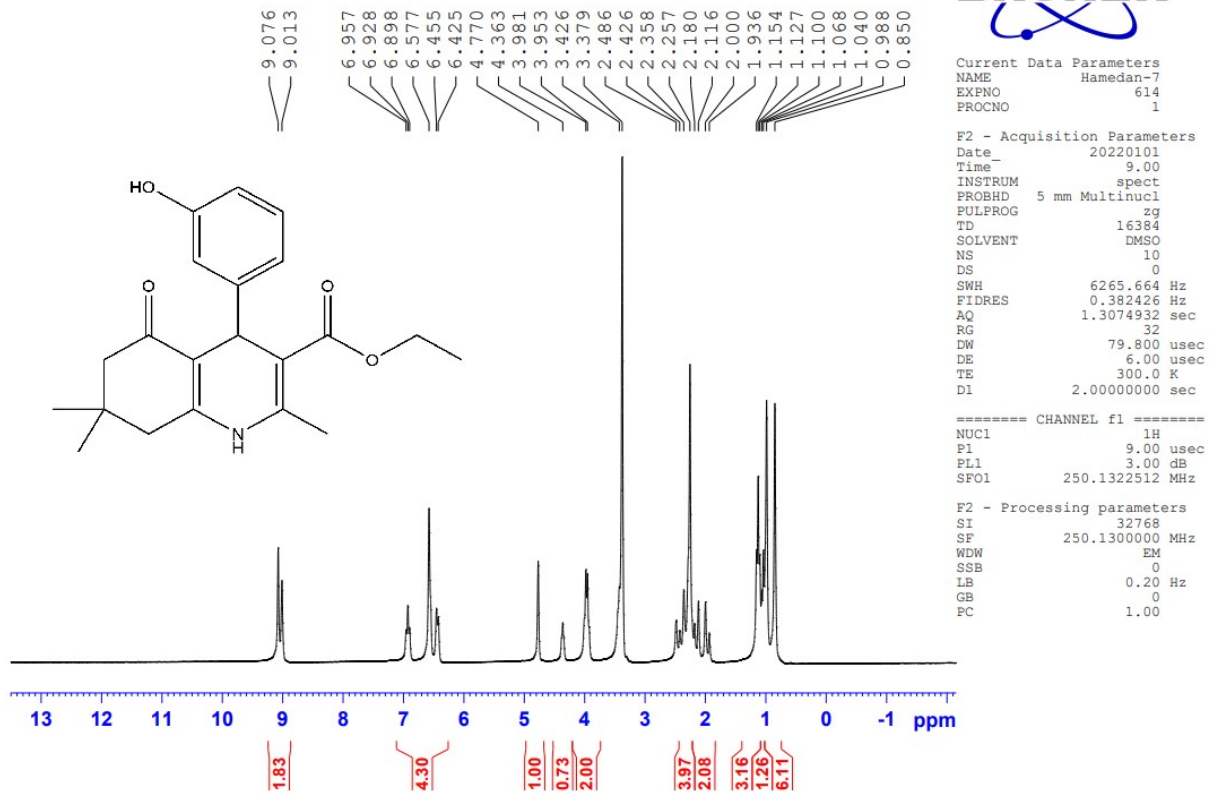

Figure S6. <sup>1</sup>H NMR spectrum of compound 5.

Zafari-3-hydroxy-benzaldehyde

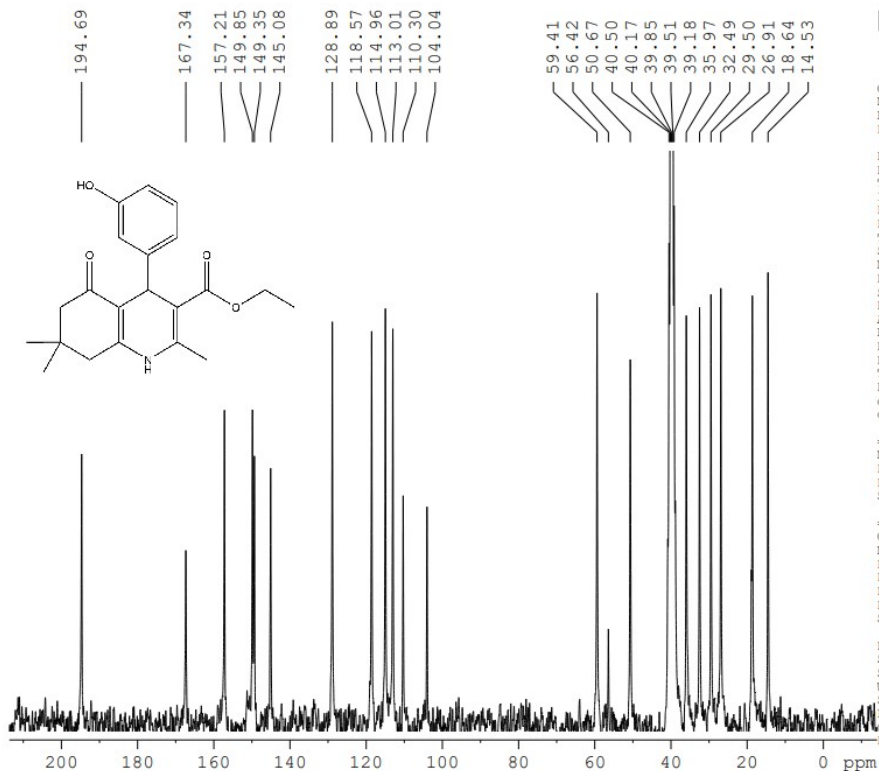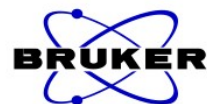

```

Current Data Parameters
NAME      Hamedan-7
EXPNO    624
PROCNO    1

F2 - Acquisition Parameters
Date_    20220103
Time     8.15
INSTRUM  spect
PROBHD   5 mm Multinucl
FULPROG  zgpgg
TD       65536
SOLVENT  DMSO
NS       349
DS       0
SWH      15060.241 Hz
FIDRES   0.229801 Hz
AQ       2.1758451 sec
RG       1625.5
DW       33.200 usec
DE       6.00 usec
TE       300.0 K
D1       2.00000000 sec
d11      0.03000000 sec
d12      0.00002000 sec

===== CHANNEL f1 =====
NUC1     13C
P1       10.00 usec
PL1      0.00 dB
SFO1     62.9015280 MHz

===== CHANNEL f2 =====
CPDPRG2  waltz16
NUC2     1H
PCPD2    80.00 usec
PL2      3.00 dB
PL12     21.50 dB
PL13     23.00 dB
SFO2     250.1310005 MHz

F2 - Processing parameters
SI       32768
SF       62.8952424 MHz
WDW      EM
SSB      0
LB       8.00 Hz
GB       0
PC       1.40
    
```

Figure S7. <sup>13</sup>CNMR spectrum of compound 5.

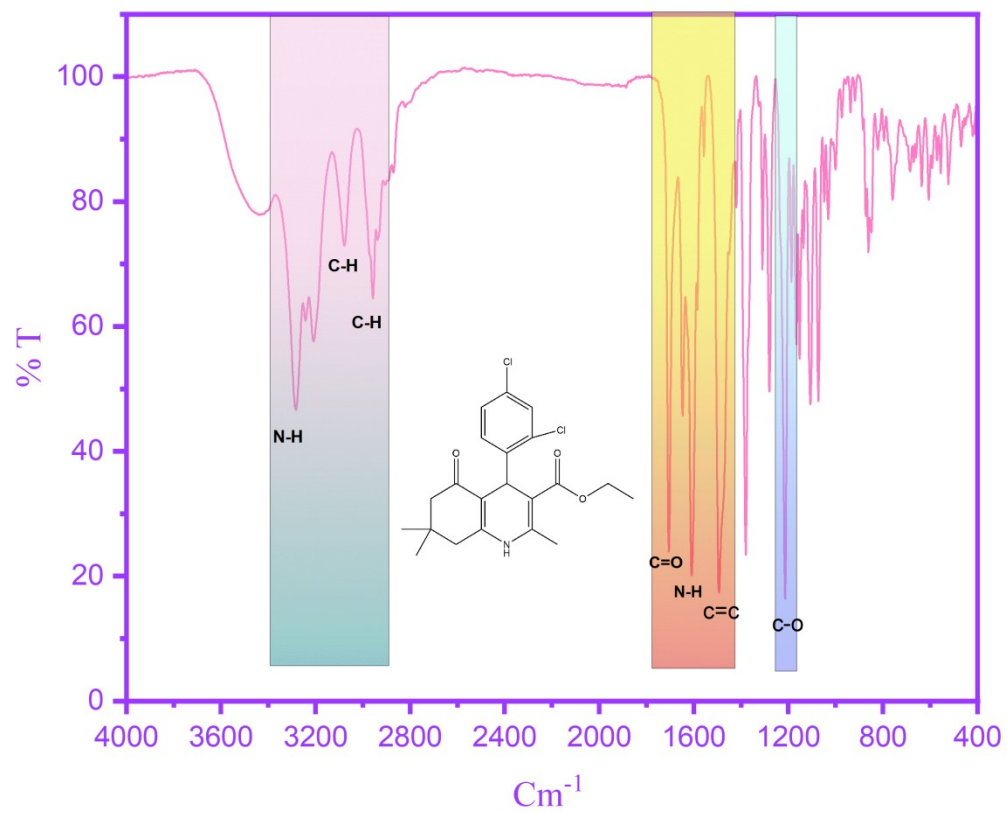

**Figure S8.** FT-IR spectrum of compound 7.

Zafari-2,4-di-chloro-benzaldehyde-1402-10-9

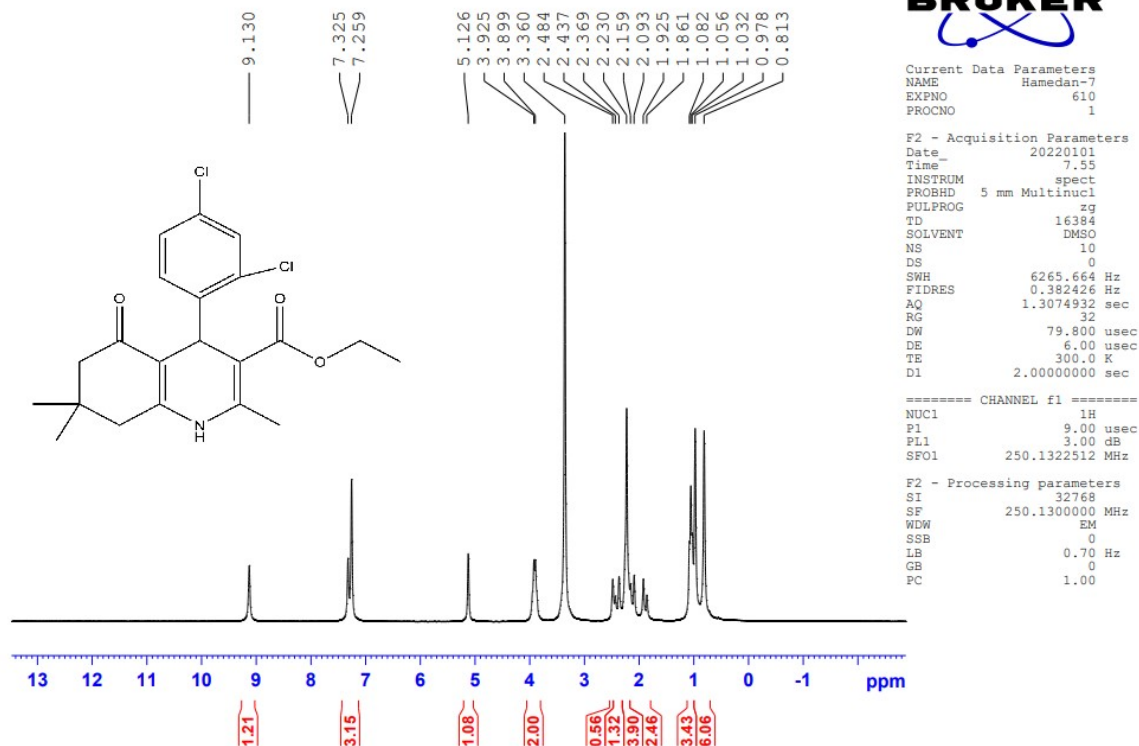

Figure S9. <sup>1</sup>H NMR spectrum of compound 7.

zafari-2,4-dichlorobenzaldehyde

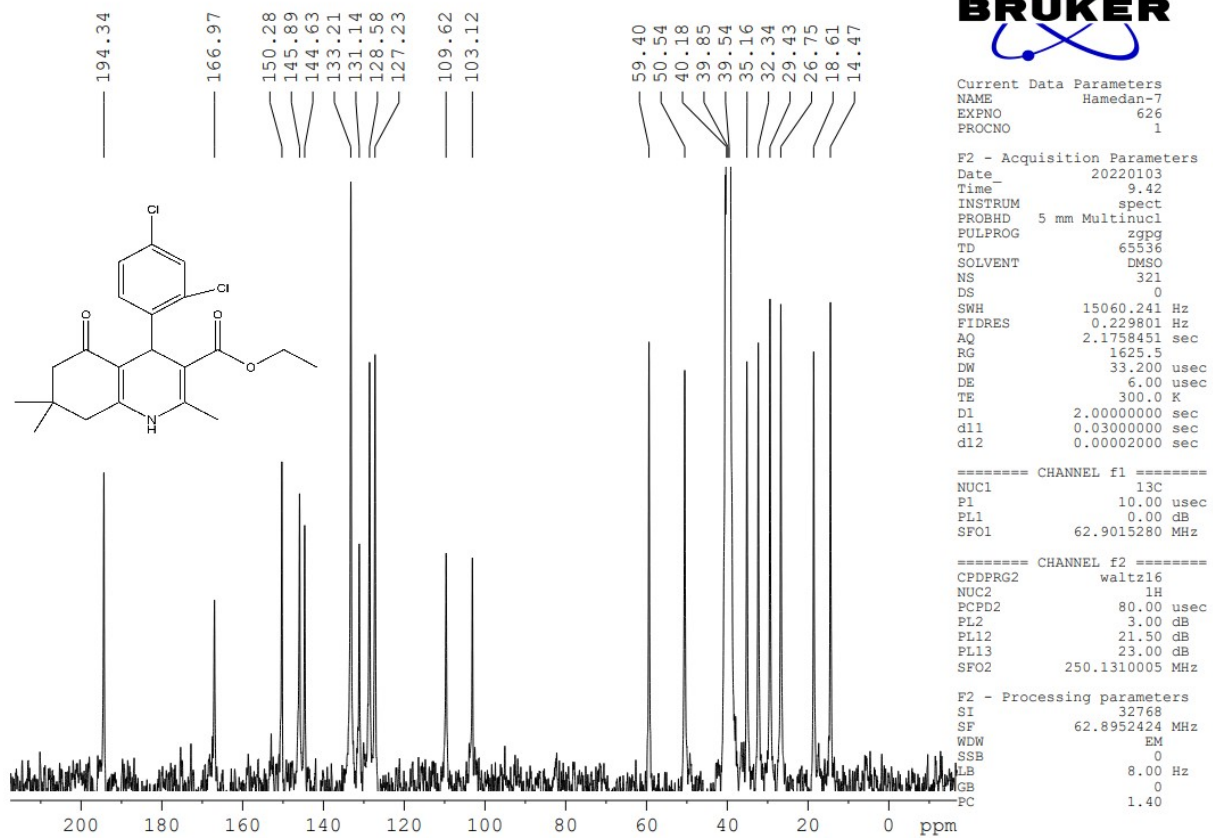

Figure S10. <sup>13</sup>CNMR spectrum of compound 7.
